# Supplementary material for: Polychlorinated biphenyls, organochlorine pesticides and polycyclic aromatic hydrocarbons in a one-off global survey of bivalves
Source: Royal Society of Chemistry journal article supplement (doi:10.1039/b918998j), 2010-01-01
Supplement: b918998j.pdf [file b918998j.pdf]

Table 1supp: List of compounds analysed and their abbreviations, also used in the text and figures.

| Compound name                          | Abbreviation  |
|----------------------------------------|---------------|
| <b>Organochlorines</b>                 |               |
| 2,4,4'-Trichlorobiphenyl               | CB-28         |
| 2,4',5-Trichlorobiphenyl               | CB-31         |
| 2,2',5,5'-Tetrachlorobiphenyl          | CB-52         |
| 2,2',4,4',5-Pentachlorobiphenyl        | CB-99         |
| 2,2',4,5,5'-Pentachlorobiphenyl        | CB-101        |
| 2,3,3',4,4'-Pentachlorobiphenyl        | CB-105        |
| 2,3,3',4',6-Pentachlorobiphenyl        | CB-110        |
| 2,3',4,4',5-Pentachlorobiphenyl        | CB-118        |
| 2,2',3,3',4,4'-Hexachlorobiphenyl      | CB-128        |
| 2,2',3,4,4',5'-Hexachlorobiphenyl      | CB-138        |
| 2,2',3,4',5',6-Hexachlorobiphenyl      | CB-149        |
| 2,2',3,5,5',6-Hexachlorobiphenyl       | CB-151        |
| 2,2',4,4',5,5-Hexachlorobiphenyl       | CB-153        |
| 2,3,3',4,4',5-Hexachlorobiphenyl       | CB-156        |
| 2,2',3,3',4,4',5-Heptachlorobiphenyl   | CB-170        |
| 2,2',3,4,4',5,5'-Heptachlorobiphenyl   | CB-180        |
| 2,2',3,4',5,5',6-Heptachlorobiphenyl   | CB-187        |
| 2,2',3,4',5,6,6'-Heptachlorobiphenyl   | CB-188        |
| 2,2',3,3',4,4',5,5'-Octachlorobiphenyl | CB-194        |
| Decachlorobiphenyl                     | CB-209        |
| $\alpha$ -Hexachlorocyclohexane        | $\alpha$ -HCH |

|                                         |               |
|-----------------------------------------|---------------|
| $\beta$ -Hexachlorocyclohexane          | $\beta$ -HCH  |
| $\gamma$ -Hexachlorocyclohexane         | $\gamma$ -HCH |
| Hexachlorobenzene                       | HCB           |
| Trans-nonachlor                         | TNC           |
| p,p'-dichloro-diphenyl-trichloroethane  | p,p'-DDT      |
| p,p'-dichloro-diphenyl-dichloroethylene | p,p'-DDE      |
| p,p'-dichloro-diphenyl-dichloroethane   | p,p'-DDD      |
| o,p'-dichloro-diphenyl-trichloroethane  | o,p'-DDT      |
| o,p'-dichloro-diphenyl-dichloroethylene | o,p'-DDE      |
| <b>PAHs</b>                             |               |
| Naphthalene                             | N             |
| 1-Methylnaphthalene                     | 1-MN          |
| 2-Methylnaphthalene                     | 2-MN          |
| C2-Naphthalenes                         | C2N           |
| C3-Naphthalenes                         | C3N           |
| Acenaphthylene                          | Acy           |
| Acenaphthene                            | Ace           |
| Fluorene                                | F             |
| Dibenzothiophene                        | DBT           |
| C1-Dibenzothiophenes                    | C1DBT         |
| C2-Dibenzothiophenes                    | C2DBT         |
| Phenanthrene                            | P             |
| 2-Methylphenanthrene                    | 2MP           |
| C1-Phenanthrenes                        | C1P           |
| C2-Phenanthrenes                        | C2P           |
| C3-Phenanthrenes                        | C3P           |

|                          |         |
|--------------------------|---------|
| Anthracene               | Ant     |
| Benzo[a]fluorene         | BaF     |
| Fluoranthene             | Fl      |
| Pyrene                   | Pyr     |
| 1-Methylpyrene           | 1MPyr   |
| Benzo[a]anthracene       | BaAnt   |
| Chrysene/Triphenylene    | Chr/Trp |
| Benzo[b+j+k]fluoranthene | BbjkFl  |
| Benzo[e]pyrene           | BePyr   |
| Benzo[a]pyrene           | BaPyr   |
| Perylene                 | Per     |
| Indeno[1,2,3-cd]pyrene   | Ipyr    |
| Benzo[g,h,i]perylene     | BghiPer |
| Dibenzo[ah]anthracene    | DBahAnt |

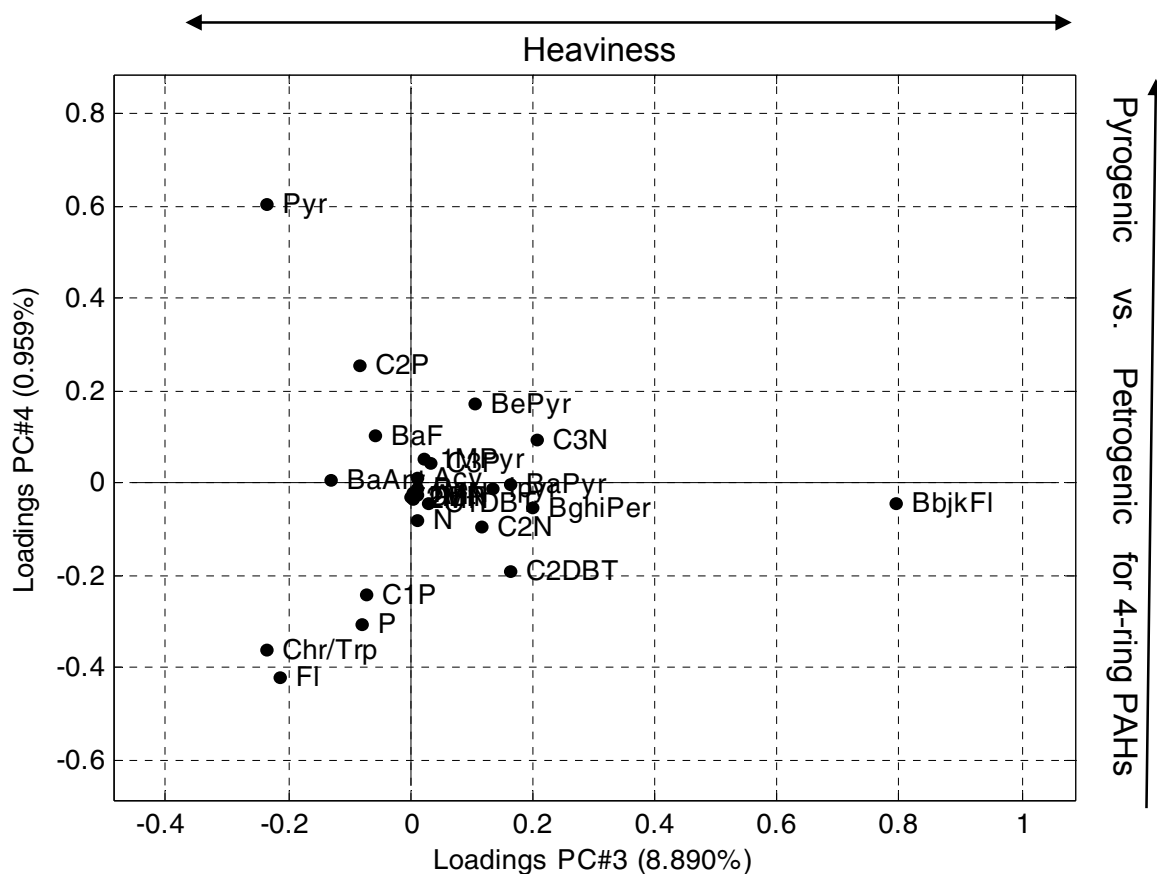

Figure 1supp: Loading plot of PC3 vs. PC4 for the PCA model based on the mean-centred training set consisting of 40 samples and 27 PAH concentrations.

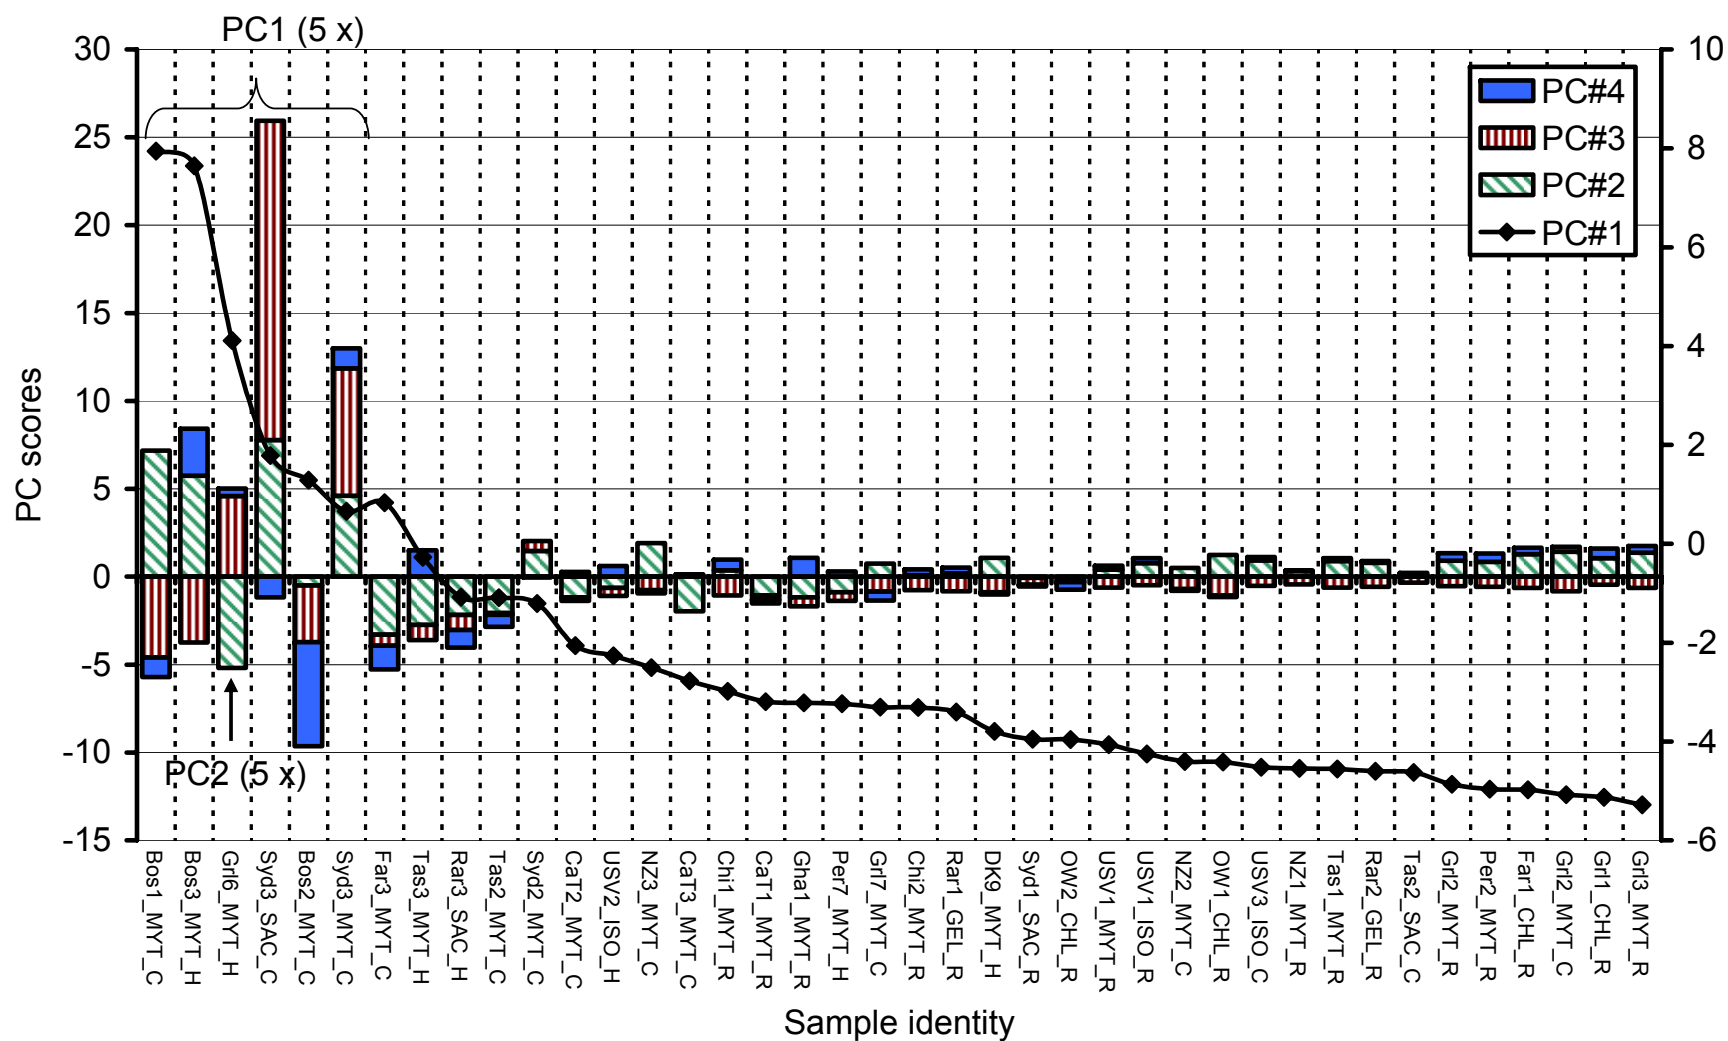

Supplementary Material (ESI) for Journal of Environmental Monitoring

This journal is © The Royal Society of Chemistry 2010

Figure 2supp: Score plots of PC1 (line with markers) and PC2 to PC4 (cumulative bar plot) for the PCA model based on the mean-centred training set consisting of 40 samples and 27 PAH concentrations. The PC1 scores for the six samples with large  $\sum\text{PAH}_{27}$  have been scaled down with a factor of five, while the PC2 scores for Gr16\_MYT\_H have been scaled up with 5.
